# Supplementary material
Source: publisher site journal article supplement (https://www.dovepress.com/article/399661)
Supplement: Supplementary file 1 [file get_supplementary_file.php]

## SUPPLEMENTARY MATERIAL TABLE 1

| NO | M/F | Age | Sinus location                              | sinus    | D_Dimer level | Risk factor                |
|----|-----|-----|---------------------------------------------|----------|---------------|----------------------------|
| 1  | P   | 36  | Transversus .left and sigmoid .left         | Multiple | High          | Autoimun                   |
| 2  | P   | 23  | Transversus .left and sigmoid .left         | Multiple | High          | Hormonal/KB                |
| 3  | P   | 38  | Transversus .left and right                 | Multiple | High          | Hormonal/KB                |
| 4  | L   | 70  | Transversus .left                           | Single   | Normal        | DM/<br>Dislipidemia        |
| 5  | P   | 44  | Transversus .left                           | Single   | Normal        | Hormonal/KB                |
| 6  | P   | 40  | Transversus .left and sigmoid .left         | Multiple | High          | Hormonal/KB                |
| 7  | L   | 62  | Transversus right                           | Single   | Normal        | Disorders of<br>hematology |
| 8  | P   | 48  | Transversus .left and sigmoid .left         | Multiple | High          | DM/<br>Dislipidemia        |
| 9  | P   | 60  | Transversus .left                           | Single   | Normal        | DM/<br>Dislipidemia        |
| 10 | P   | 54  | Transversus .left                           | Single   | High          | Disorders of<br>hematology |
| 11 | P   | 52  | Transversus .left                           | Single   | Normal        | DM/<br>Dislipidemia        |
| 12 | L   | 21  | transversus right and sigmoid right         | Multiple | High          | Disorders<br>ofhematology  |
| 13 | L   | 27  | Transversus .left                           | Single   | Normal        | Disorders of<br>hematology |
| 14 | L   | 31  | Transversus right                           | Single   | Normal        | DM/<br>Dislipidemia        |
| 15 | P   | 37  | Transversus right                           | Single   | Normal        | DM/<br>Dislipidemia        |
| 16 | P   | 50  | transversus .left. sagitalis superior .left | Multiple | High          | DM/<br>Dislipidemia        |
| 17 | P   | 39  | Transversus .left and sigmoid .left         | Multiple | High          | Hormonal/KB                |
| 18 | P   | 42  | Transversus .left and sigmoid .left         | Multiple | High          | Hormonal/KB                |
| 19 | P   | 39  | Transversus .left                           | Single   | High          | Disorders of<br>hematology |
| 20 | L   | 42  | transversus .left. straight sinus           | Multiple | Normal        | Disorders of<br>hematology |
| 21 | L   | 44  | Transversus .left and sigmoid .left         | Multiple | Normal        | DM/<br>Dislipidemia        |
| 22 | L   | 44  | transversus right and sigmoid right         | Multiple | High          | DM/<br>Dislipidemia        |
| 23 | P   | 31  | transversus right and sigmoid right         | Multiple | High          | Disorders of<br>hematology |
| 24 | P   | 33  | Transversus right                           | Single   | Normal        | Hormonal/KB                |
| 25 | P   | 64  | Transversus .left                           | Single   | Normal        | DM/<br>Dislipidemia        |
| 26 | L   | 62  | Transversus .left                           | Single   | Normal        | DM/<br>Dislipidemia        |
| 27 | P   | 52  | Transversus .left                           | Single   | Normal        | Disorders of<br>hematology |
| 28 | P   | 24  | Transversus .left and sigmoid .left         | Multiple | High          | Disorders of<br>hematology |
| 29 | L   | 43  | Transversus right                           | Single   | Normal        | Disorders of<br>hematology |
| 30 | P   | 64  | Transversus .left                           | Single   | Normal        | DM/<br>Dislipidemia        |
| 31 | P   | 35  | Transversus .left and sigmoid .left         | Multiple | High          | Hormonal/KB                |

|    |     |    |                                     |          |        |                         |
|----|-----|----|-------------------------------------|----------|--------|-------------------------|
| 32 | P   | 20 | transversus right and sigmoid right | Multiple | High   | Disorders of hematology |
| 33 | P   | 38 | Transversus .left and sigmoid .left | Multiple | High   | Hormonal/KB             |
| 34 | P   | 44 | Transversus .left and sigmoid .left | Multiple | High   | Hormonal/KB             |
| 35 | P   | 51 | Transversus .left                   | Single   | High   | Hormonal/KB             |
| 36 | P   | 39 | transversus right and sigmoid right | Multiple | High   | Disorders of hematology |
| 37 | P   | 45 | Transversus .left and sigmoid .left | Multiple | High   | Hormonal/KB             |
| 38 | P   | 37 | Transversus .left and sigmoid .left | Multiple | High   | DM/<br>Dislipidemia     |
| 39 | L   | 55 | Transversus .left and sigmoid .left | Multiple | High   | Keganasan               |
| 40 | P   | 47 | Transversus .left and sigmoid .left | Multiple | High   | DM/<br>Dislipidemia     |
| 41 | PYN | 48 | Transversus .left and sigmoid .left | Multiple | High   | DM/<br>Dislipidemia     |
| 42 | L   | 54 | Transversus .left and sigmoid .left | Multiple | High   | DM/<br>Dislipidemia     |
| 43 | L   | 58 | Transversus .left                   | Single   | Normal | DM/<br>Dislipidemia     |
| 44 | P   | 50 | Transversus .left and sigmoid .left | Multiple | High   | DM/<br>Dislipidemia     |
| 45 | P   | 55 | Transversus .left and sigmoid .left | Multiple | High   | DM/<br>Dislipidemia     |
| 46 | P   | 70 | Transversus .left and sigmoid .left | Multiple | High   | Keganasan               |
| 47 | L   | 31 | Transversus .left and sigmoid .left | Multiple | High   | DM/<br>Dislipidemia     |
| 48 | L   | 40 | Sagitalis superior                  | Single   | Normal | DM/<br>Dislipidemia     |
| 49 | L   | 65 | Transversus .left                   | Single   | Normal | DM/<br>Dislipidemia     |
| 50 | P   | 33 | Transversus .left and sigmoid .left | Multiple | High   | Hormonal/KB             |
| 51 | P   | 36 | Transversus .left and sigmoid .left | Multiple | High   | Hormonal/KB             |
| 52 | P   | 44 | Transversus .left and sigmoid .left | Multiple | High   | Hormonal/KB             |
| 53 | P   | 32 | Transversus .left and sigmoid .left | Multiple | High   | Hormonal/KB             |
| 54 | P   | 50 | Transversus .left and sigmoid .left | Multiple | High   | Disorders of hematology |
